# Supplementary material for: Acceptance, adherence and dropout rates of individuals with COPD approached in telehealth interventions: a protocol for systematic review and meta-analysis
Source: PubMed Central journal article supplement — BMJ Open. 2019 Apr 25;9(4):e026794. doi: 10.1136/bmjopen-2018-026794 (PMC6501945; doi:10.1136/bmjopen-2018-026794), 2019-04-25
Supplement: bmjopen-2018-026794.draft_revisions.pdf [file bmjopen-2018-026794.draft_revisions.pdf]

# BMJ Open

BMJ Open is committed to open peer review. As part of this commitment we make the peer review history of every article we publish publicly available.

When an article is published we post the peer reviewers' comments and the authors' responses online. We also post the versions of the paper that were used during peer review. These are the versions that the peer review comments apply to.

The versions of the paper that follow are the versions that were submitted during the peer review process. They are not the versions of record or the final published versions. They should not be cited or distributed as the published version of this manuscript.

BMJ Open is an open access journal and the full, final, typeset and author-corrected version of record of the manuscript is available on our site with no access controls, subscription charges or pay-per-view fees (<http://bmjopen.bmj.com>).

If you have any questions on BMJ Open's open peer review process please email [info.bmjopen@bmj.com](mailto:info.bmjopen@bmj.com)

# BMJ Open

## Acceptance, adherence, and dropout rates of individuals with COPD approached in telemonitoring interventions: A protocol for systematic review and meta-analysis.

|                               |                                                                                                                                                                                                                                                                                                                                                                                                                                                                                                                                                                                                                                                                                                                                                                                                                                                                                                            |
|-------------------------------|------------------------------------------------------------------------------------------------------------------------------------------------------------------------------------------------------------------------------------------------------------------------------------------------------------------------------------------------------------------------------------------------------------------------------------------------------------------------------------------------------------------------------------------------------------------------------------------------------------------------------------------------------------------------------------------------------------------------------------------------------------------------------------------------------------------------------------------------------------------------------------------------------------|
| Journal:                      | <i>BMJ Open</i>                                                                                                                                                                                                                                                                                                                                                                                                                                                                                                                                                                                                                                                                                                                                                                                                                                                                                            |
| Manuscript ID                 | bmjopen-2018-026794                                                                                                                                                                                                                                                                                                                                                                                                                                                                                                                                                                                                                                                                                                                                                                                                                                                                                        |
| Article Type:                 | Protocol                                                                                                                                                                                                                                                                                                                                                                                                                                                                                                                                                                                                                                                                                                                                                                                                                                                                                                   |
| Date Submitted by the Author: | 19-Sep-2018                                                                                                                                                                                                                                                                                                                                                                                                                                                                                                                                                                                                                                                                                                                                                                                                                                                                                                |
| Complete List of Authors:     | Alghamdi, Saeed ; McGill University, School of Physical and Occupational Therapy; Umm Al-Qura University College of Applied Sciences, Department of Respiratory Care<br>Janaudis-Ferreira, Tania; McGill University, School of Physical and Occupational Therapy; McGill University Health Center, Center for outcome research and evaluation (CORE)<br>Alhasani, Rehab; McGill University, School of Physical and Occupational Therapy; Centre de recherche interdisciplinaire en réadaptation, Centre de Réadaptation Constance-Lethbridge, CIUSSS du Centre-Ouest-de-d'île-de-Montréal<br>Boruff, Jill; McGill University, Schulich Library of Science and Engineering<br>Ahmed, Sara; McGill University, School of Physical and Occupational Therapy; Centre de recherche interdisciplinaire en réadaptation, Centre de Réadaptation Constance-Lethbridge, CIUSSS du Centre-Ouest-de-d'île-de-Montréal |
| Keywords:                     | Systematic review, Meta-analysis, Telemonitoring, Telehealth, Chronic obstructive pulmonary disease, COPD                                                                                                                                                                                                                                                                                                                                                                                                                                                                                                                                                                                                                                                                                                                                                                                                  |
|                               |                                                                                                                                                                                                                                                                                                                                                                                                                                                                                                                                                                                                                                                                                                                                                                                                                                                                                                            |

SCHOLARONE™  
Manuscripts

**Title:** Acceptance, adherence, and dropout rates of individuals with COPD approached in telemonitoring interventions: A protocol for systematic review and meta-analysis.

### Authors

Saeed Alghamdi<sup>1,2</sup>, Tania Janaudis-Ferreira<sup>1,4,5</sup>, Rehab Alhasani<sup>1,3</sup>, Jill Boruff<sup>6</sup>, Sara Ahmed<sup>1,3,4</sup>

### Affiliations

1 School of Physical and Occupational Therapy, McGill University, Montreal, QC, Canada

2 College of Applied Health Science, Umm Al Qura University, Department of Respiratory Care, Makkah, Saudi Arabia

3 Centre de recherche interdisciplinaire en réadaptation, Centre de Réadaptation Constance-Lethbridge, CIUSSS du Centre-Ouest-de-d'île-de-Montréal, Montreal QC, Canada

4 Center for outcome research and evaluation (CORE), McGill University Health Center, Montreal, QC, Canada

5 Translational Research in Respiratory Diseases program, Research Institute of the McGill University Health Centre, Montreal, Canada

6 Schulich Library of Science and Engineering, McGill University, Montreal, QC, Canada

### Corresponding author

Dr Sara Ahmed, School of Physical and Occupational therapy, Faculty of Medicine, McGill University Health Center, Montreal, Quebec, H3G 1Y5, Canada.

Tel: 1 514 3984400 ext. 00531

Fax: 1 514 398 6360

Email: [sara.ahmed@mcgill.ca](mailto:sara.ahmed@mcgill.ca)

### Keywords

Systematic review, meta-analysis, telemonitoring, telehealth, chronic obstructive pulmonary disease, COPD

### Word count

2599

### Registration ID number

International Prospective Register for Systematic Reviews (PROSPERO) ID number: CRD42017078541

1  
2  
3  
4  
5  
6  
7  
8  
9  
10  
11  
12  
13  
14  
15  
16  
17  
18  
19  
20  
21  
22  
23  
24  
25  
26  
27  
28  
29  
30  
31  
32  
33  
34  
35  
36  
37  
38  
39  
40  
41  
42  
43  
44  
45  
46  
47  
48  
49  
50  
51  
52  
53  
54  
55  
56  
57  
58  
59  
60

For peer review only

## Abstract

**Introduction:** Telehealth and/or telemonitoring (TM) interventions have the potential of improving exacerbation and health outcomes for individuals with Chronic Obstructive Pulmonary Disease (COPD), by delivering care in between clinical visits. However, the precise impact on avoiding exacerbation and reducing the incidence of hospital readmissions remains inconclusive. This lack of knowledge on the effectiveness of telehealth and telemonitoring for COPD care might be due to non-adherence or partial adherence to the intervention and/or the withdrawal of participants over the course of previous studies.

**Objectives:** To conduct a systematic review of experimental and non-experimental studies to: (1) estimate the acceptance, adherence, and dropout rates in experimental and observational studies; (2) identify the reasons for dropout from TM interventions among individuals with COPD; (3) evaluate the impact of trial-related, sociodemographic, and intervention-related factors on the acceptance, adherence, and dropout rates; and (4) estimate the extent to which the acceptance, adherence, and dropout rates impact outcomes in comparison with usual monitoring.

**Methods and analysis:** A systematic literature review of four databases will be carried out using CINAHL, Medline (Ovid), Cochrane Library, and Embase. Randomized and non-randomized control studies will be included, in addition to pre-post observational studies comparing telehealth and/or telemonitoring with standard monitoring among individuals with COPD only. Two independent reviewers will screen all relevant abstracts and full-text studies to determine eligibility, assess the risk of bias, and extract the data using structured forms. If the included studies are sufficiently homogenous in terms of interventions, populations, and objectives, a meta-analysis will be performed.

## Ethics and dissemination

Ethical considerations are not required for this research.

## Registration

This systematic review and meta-analysis is registered in the Prospero Registry (CRD42017078541)

## Word count

250

### Strengths and limitations

- This systematic review aims to objectively estimate the acceptance, adherence, and dropout rates of people with COPD enrolled in telehealth and/or telemonitoring interventions, and the associated variables that potentially impact or are impacted by these rates.
- This systematic review will update existing knowledge on trial-related, patient-related, and intervention-related factors potentially influencing the acceptance, adherence, and dropout rates.
- Exploring acceptance, adherence, and dropout rates in COPD telehealth care and the associated factors will allow future researchers to design prospective clinical trials, while increasing the validity and generalizability of their results.
- The exclusion of papers written in languages other than English might leave relevant studies out of the review.

## INTRODUCTION

According to the Global Initiative for Chronic Obstructive Lung Disease (GOLD), *chronic obstructive pulmonary disease (COPD) is a common disease characterized by the persistent limitation of airflow to the lungs. It can be prevented and treated; furthermore, it is progressive in nature and associated with enhanced chronic inflammatory responses (in the airways and lungs) to noxious gases* [1]. Airflow limitations in COPD can lead to respiratory exacerbation which is defined as *an acute worsening of respiratory symptoms* [1]. Exacerbations can negatively impact an individual's health status, often resulting in hospitalization [2, 3]. COPD is a major public health problem, and individuals with COPD require appropriate management strategies to minimize the likelihood of hospitalization [4].

Telemonitoring is a component of telehealth interventions used to deliver COPD care; it can help detect exacerbations at an early stage, consequently minimizing emergency admissions and facilitating self-management (Table 1) [5–8]. Telemonitoring is also used for remote monitoring of a patient's clinical data, such as their vital signs; this enables healthcare teams to identify disease deterioration at an early stage and provide the requisite care in a timely manner. This has the effect of helping individuals control their diseases and for facilitating early detection of disease exacerbation [9]. There is evidence that telehealth and/or telemonitoring is a useful tool for minimizing hospital admissions due to respiratory exacerbations, particularly in the case of individuals who are constrained by geographical barriers, or have limited access to healthcare services [8, 10]. Clinical trials show that individuals with COPD have positive attitudes towards participating in telehealth and/or telemonitoring interventions [11–16]. However, the precise impact of telehealth and telemonitoring on avoiding exacerbation and reducing hospital readmissions remains inconclusive [8]. The lack of knowledge might be due to non-adherence or partial adherence to intervention techniques as well as the withdrawal of participants over the course of previous studies [17]. Dropout rates for telehealth and telemonitoring vary across clinical trials [5, 18–21]. It is unclear which variables are most strongly associated with non-adherence and withdrawal, although possible factors may be related to participant characteristics, intervention characteristics, and the context and environment in which the intervention is delivered. Understanding the characteristics of individuals with COPD, features of the interventions undertaken, and the environment of clinical trials is essential for reducing dropout rates in future studies. Such understanding will help with designing prospective clinical trials, while also increasing the validity and generalizability of their results [22, 23]. Evaluating the reasons that prevent individuals with COPD from enrolling and completing telehealth and telemonitoring interventions may help clinicians appropriately tailor interventions to the individuals' needs and limit dropout rates [17, 22]. Moreover, researchers can explore individual's preferences and use them to develop more desirable and feasible telehealth and telemonitoring interventions.

## OBJECTIVES

The objectives of this systematic review are to:

- (1) estimate acceptance, adherence, and dropout rates in experimental and observational studies;
- (2) identify the reasons for dropout from the intervention;
- (3) estimate the impact of trial-related factors, sociodemographic factors, and intervention-related factors on acceptance, adherence, and dropout rates;
- (4) estimate the extent to which acceptance, adherence, and dropout rates affect patient's

1  
2  
3 outcomes.

## 4 5 **METHODS**

6 This systematic review and meta-analysis is registered with the Prospero Registry  
7 (CRD42017078541). This systematic review will be conducted according to the Preferred  
8 Reporting Items for Systematic review and Meta-Analysis Protocols (PRISMA-P).  
9

### 10 11 **Inclusion criteria**

12 (1) Study type: randomized or non-randomized control trials, observational single arm pre-post  
13 trials, and crossover clinical trials;

14 (2) Population: studies including individuals diagnosed with COPD based on reported FEV1%  
15 will be considered for this review;

16 (3) Type of intervention: this review includes telehealth interventions in which patients receive  
17 telehealth and/or telecare, telehomecare, e-health, telemonitoring, telerehabilitation,  
18 telemedicine, home monitoring, digital monitoring, web-based monitoring, or internet-based  
19 monitoring as part of a COPD-management plan. In principal, any information technology tool  
20 designed for the clinical support of patients with COPD involving the exchange of data remotely  
21 between the patient and health care professional will be considered;

22 (4) Type of outcome: outcomes include health-related quality of life, adherence to the action  
23 plan, exacerbations, duration of hospital stay, hospitalization or utilization of health services  
24 (including COPD related cost), and exercise capacity.  
25  
26  
27

### 28 29 **Exclusion criteria**

30 (1) Trials not published in English;

31 (2) Studies that do not describe the telehealth and/or telemonitoring intervention researched,  
32 including delivery methods, mode of administration, and frequency of data transmissions;

33 (3) Studies that do not report the number of individuals who were approached, who gave their  
34 consent, and who dropped out.  
35

## 36 37 **SEARCH STRATEGY**

### 38 **Electronic databases**

39 A systematic search of the following databases will be undertaken to identify relevant articles:  
40 CINAHL; Medline (Ovid); Cochrane Library, and Embase. The following Medical Subject  
41 Headings (Mesh terms)/Subject headings and/or keywords and combinations thereof will be  
42 used: telecare; telehomecare; telehealth; e-health; telemonitoring; telerehabilitation;  
43 telemedicine; home monitoring; digital monitoring; web-based monitoring; internet-based  
44 monitoring; Chronic Obstructive Pulmonary Disease; Chronic Obstructive lung disease, and  
45 COPD. The search strategy was developed in collaboration with a health sciences librarian (JB),  
46 to ensure the involvement of appropriate and necessary keywords in the review. Keywords and  
47 subject terms will be customized for each database. Further, all words with the prefix “tele-” will  
48 be searched both with and without a hyphen (e.g., both “tele-monitoring” and “telemonitoring”).  
49 The search strategies from Medline (Ovid) are presented in Appendix 1.  
50  
51

### 52 53 **Manual literature search**

54 We will perform manual searches of reference lists of all relevant primary studies and systematic  
55 reviews to identify any additional studies that were not captured by our original search.  
56  
57  
58  
59  
60



### **Reference manager**

All articles will be imported to EndNote software and any duplicates removed.

### **Search procedures**

The search will be performed by two team members (SA, JB), after which all articles will be imported to EndNote version 7.7 and any duplicates removed. All article titles and abstracts will be screened by two independent reviewers. A manual search of the reference lists of relevant studies shall be undertaken, to identify any additional articles that were missed by the database search but that might be suitable for inclusion in the review. Subsequently a full-text review of all the included articles will be carried out. Disagreements between reviewers will be resolved through discussion. If no consensus can be reached, a third reviewer's decision will be considered. Any study that does not meet the inclusion criteria will be excluded and the reasons for exclusion recorded according to the PRISMA flowchart.

### **Study selection and data extraction**

A data extraction form will be created using an Excel sheet. Two independent reviewers will perform the data extraction. First, reviewers will pilot the data extraction form based on ten included studies. Second, any disagreement between reviewers at this stage will be resolved by consensus. If no consensus can be reached, a third reviewer will make the decision. The first reviewer will then start extracting data. The second reviewer will check the consistency of the data and identify any errors. In case information is missing from an included study's published manuscript, its authors will be contacted and asked for clarification.

### **Data extraction and data management**

Data related to the study characteristics, population characteristics, and intervention characteristics, as defined in the intervention Complexity Assessment Tool for Systematic Reviews (iCAT-SR), shall be extracted [24].

Study characteristics: authors' names; year of publication; country; research design, as well as recruitment methods.

Population characteristics: age; gender; level of education; GOLD grade and/or Forced Expiratory Volume in one second (FEV1%); smoking history; number of COPD patients who consented to participate, were approached, dropped out, and completed the study, as well as reasons for dropout.

Intervention characteristics: settings, methods, frequency and components of telehealth and/or telemonitoring (active elements, targeted behavior, targeted users, the degree of tailoring, health professional assistance), and duration of intervention.

### **OUTCOMES**

All reported outcomes of COPD will be extracted, as will the effect size (ES) of telehealth and/or telemonitoring intervention on these outcomes. The ES will be calculated if it is not mentioned by the author(s). ES calculation will be performed according to results from the first post-interventional evaluation, which will reflect the impact of telehealth and/or telemonitoring interventions on outcomes.

### **Primary outcomes**

1  
2  
3 All primary and secondary outcomes defined by each study will be extracted. These include, but  
4 are not limited to:  
5

6 Hospitalization: admissions due to exacerbations and causes of hospitalization will be reported.  
7 Attention shall be paid to differences between count and dichotomous data (e.g., the count of  
8 participants in each group who experience at least one exacerbation event vs. number of events  
9 per intervention group).  
10

11  
12 Exacerbation rate is a commonly reported outcome [25]. As exacerbations can be reported in  
13 different ways, the data collection allows for the following numbers to be recorded: number of  
14 exacerbations or exacerbation rate (that may also be classified based on the patient disease  
15 severity), all-cause mortality, and number of patients per study group who died during the  
16 survey.  
17

18  
19 Adherence to the Action Plan: (including any measurement mentioned by the authors to report  
20 the adherence to the action plan – e.g., adherence to intervention, adherence to physiological  
21 monitoring, adherence to symptom monitoring, adherence to medication, adherence to exercise,  
22 and adherence telehealth and/or telemonitoring)  
23

24  
25 Health-related quality of life: disease-specific or non-disease-specific quality of life reported by a  
26 validated instrument.  
27

28  
29 Physical activity measurements (any type reported by a validated measurement system).  
30

### 31 **Risk of bias assessment**

32 Two team members (SA, RA) will independently assess the risk of bias for each study included  
33 in the review; the Cochrane Collaboration Risk of Bias criteria will be used for randomized  
34 clinical trials (RCTs), and SIGN checklist will be used for observational studies. Reviewers will  
35 independently report justifications and comments for their decisions. A third team member will  
36 be consulted to resolve any discrepancies. The AMSTAR II tool will be used to assess this  
37 systematic review's risk of bias.  
38

### 39 **DATA ANALYSIS**

40  
41 Outcomes of this review are acceptance, adherence, and dropout rates. The acceptance rate will  
42 be calculated by taking the total number of participants who accepted, agreed, and consented to  
43 participate in this study and dividing it by the number of participants who were approached for  
44 involvement in telehealth intervention. The adherence rate will be calculated as the total number  
45 of participants who completed the telehealth intervention according to the study protocol divided  
46 by the number who started the intervention. The dropout rate will be calculated as number of  
47 participants who withdrew from or did not continue with the intervention divided by the number  
48 of participants who consented to participate on the study. All rates will be presented using an  
49 overall average.  
50  
51

52  
53 Statistical Analysis System (SAS) software will be used to run regression models. Possible  
54 variables associated with rates will be categorized and tested using the univariate analysis model.  
55 Subsequently, a random effect meta regression analysis will be used to estimate the effects of the  
56  
57  
58  
59

1  
2  
3 participant, study, and intervention characteristics on acceptance, adherence, dropout rates. A  
4 separate model analysis will be conducted for each rate.

5 Heterogeneity for the meta-analysis will be tested using the I<sup>2</sup> statistic. The reliability of the I<sup>2</sup>  
6 estimation will be confirmed using a 95% confidence interval. If the interventions, populations,  
7 and outcomes are homogenous, a meta-analysis will be performed. If we are restricted in this  
8 regard and unable to perform a meta-analysis, we will synthesize and summarize the results  
9 narratively.  
10  
11

### 12 **Dealing with missing data**

13 Authors will be contacted to obtain any unreported data.  
14  
15

## 16 **DISCUSSION**

17 This systematic review aims to objectively estimate the acceptance, adherence, and dropout rates  
18 of COPD populations enrolled in telehealth and/or telemonitoring and the associated variables  
19 that might affect or be affected by these rates. It will help identify the extent to which associated  
20 variables can be used for an improved design of clinical trials, to suggest the characteristics of  
21 associated target populations, and to recommend elements for inclusion in telehealth intervention  
22 to support self-management.  
23  
24

25 To the best of our knowledge, this will be the first systematic review estimating acceptance,  
26 adherence, and dropout rates of COPD populations participating in telehealth and/or  
27 telemonitoring, as well as the associated factors influencing these rates. Previous systematic  
28 reviews and meta-analyses were unable to provide information about effective elements  
29 contributing to better acceptance and adherence rates; in contrast, our current study will try to  
30 explore elements of telehealth and/or telemonitoring that impact acceptance, adherence, and  
31 dropout rates [26, 27]. We will provide specific information about the trials' characteristics  
32 (RCTs vs. observational), population characteristics (i.e. mild severity vs. moderate severity),  
33 and intervention characteristics (i.e., primary care settings vs. specialty care settings), as well as  
34 how such information may facilitate users' adherence to telehealth interventions.  
35  
36

37 Our systematic review will analyze the literature using meta-analysis, and in doing so provide  
38 the advantage of having an opportunity to investigate and understand the correlation between  
39 pertinent factors and acceptance, adherence, and dropout rates. Furthermore, existing evidence  
40 on acceptance, adherence, and dropout rates will inform methods for designing future telehealth  
41 projects focusing on COPD. This study may also be beneficial for the management of grants for  
42 research in the field [28]. It will contribute to future research by identifying the target  
43 populations among which telehealth and/or telemonitoring are accepted, and identify feasible  
44 interventions. Finally, this systematic review will help tailor technological interventions to more  
45 effectively meet the needs of COPD patients.  
46  
47  
48

### 49 **Ethics and dissemination**

50 This systematic review requires no ethics approval. This research will use no confidential or  
51 personal patient data. Findings will be disseminated through publication in a peer-reviewed  
52 specific journal.  
53  
54

### 55 **Funding**

56  
57  
58  
59  
60

1  
2  
3 The main author disclosed receipt of the following financial support for the research, authorship,  
4 and/or publication of this article. This study was supported by a scholarship from Umm Al Qura  
5 University in Saudi Arabia, Sara Ahmed is supported by an Fonds de recherche Santé (FRQS)  
6 career award.  
7  
8  
9  
10  
11  
12  
13  
14  
15  
16  
17  
18  
19  
20  
21  
22  
23  
24  
25  
26  
27  
28  
29  
30  
31  
32  
33  
34  
35  
36  
37  
38  
39  
40  
41  
42  
43  
44  
45  
46  
47  
48  
49  
50  
51  
52  
53  
54  
55  
56  
57  
58  
59  
60

For peer review only

## REFERENCES

1. GOLD, G.I.f.C.O.L.D. Diagnosis of Disease of Chronic Airflow Limitation: Asthma, COPD and Asthma-COPD Overlap Syndrome (ACOS). Global Initiative for Chronic Obstructive Lung Disease GOLD. 2017:18.
2. Fletcher MJ, Upton J, Taylor-Fishwick J, et al. COPD uncovered: an international survey on the impact of chronic obstructive pulmonary disease [COPD] on a working age population. *BMC Public Health*. 2011;**11**(612):1-13
3. Halbert RJ, Natoli JL, Gano A, Badamgarav E, Buist AS, Mannino DM. Global burden of COPD: systematic review and meta-analysis. *Eur Respir J*. 2006;**28**(3):523-532.
4. Yang F, Xiong ZF, Yang C, et al. Continuity of Care to Prevent Readmissions for Patients with Chronic Obstructive Pulmonary Disease: A Systematic Review and Meta-Analysis. *COPD*. 2017;**14**(2):251-261.
5. Chau JP, Lee DT, Yu DS, et al. A feasibility study to investigate the acceptability and potential effectiveness of a telecare service for older people with chronic obstructive pulmonary disease. *Int J Med Inform*. 2012;**81**(10):674-682.
6. Cox NS, Oliveira CC, Lahham A, Holland AE. Pulmonary rehabilitation referral and participation are commonly influenced by environment, knowledge, and beliefs about consequences: a systematic review using the Theoretical Domains Framework. *J Physiother*. 2017;**63**(2):84-93.
7. Paré G, Jaana M, and C Sicotte. Systematic review of home telemonitoring for chronic diseases: the evidence base. *J Am Med Inform Assoc*. 2007;**14**(3):269-277.
8. Selzler AM, Wald J, Sedeno M, et al. Telehealth pulmonary rehabilitation: A review of the literature and an example of a nationwide initiative to improve the accessibility of pulmonary rehabilitation. *Chron Respir Dis*. 2018;**15**(1):41-7.
9. Crist TM, Kaufman SB, Crampton K.R. Home telemedicine: a home health care agency strategy for maximizing resources. *HHCMP*. 1996;**8**(4):1-9.
10. McKinstry B. The use of remote monitoring technologies in managing chronic obstructive pulmonary disease. *QJM*. 2013;**106**(10):883-5.
11. Almojaibel AA. Delivering pulmonary rehabilitation for patients with chronic obstructive pulmonary disease at home using telehealth: A review of the literature. *SJMMS*. 2016;**4**(3):164-171.
12. Burkow TM, Vognild LK, Østengen G, et al. Internet-enabled pulmonary rehabilitation and diabetes education in group settings at home: a preliminary study of patient acceptability. *BMC Med Inform Decis Mak*. 2013;**13**(33):1-10.
13. Holland AE, Hill CJ, Rochford P, Fiore J, Berlowitz DJ, McDonald CF. Telerehabilitation for people with chronic obstructive pulmonary disease: feasibility of a simple, real time model of supervised exercise training. *Journal of telemedicine and telecare*. 2013;**19**(4):222-6.
14. Paneroni M, Colombo F, Papalia A, et al. Is telerehabilitation a safe and viable option for patients with COPD? A feasibility study. *COPD*. 2015;**12**(2):217-225.
15. Tabak M, Brusse-Keizer M, van der Valk P, Hermens H, Vollenbroek-Hutten M. A telehealth program for self-management of COPD exacerbations and promotion of an active lifestyle: a pilot randomized controlled trial. *Int J Chron Obstruct Pulmon Dis*. 2014;**9**:935-44.

16. Zanaboni P, Lien LA, Hjalmsen A, Wootton R. Long-term telerehabilitation of COPD patients in their homes: interim results from a pilot study in Northern Norway. *J Telemed Telecare*. 2013;**19**(7):425-9.
17. Cruz J, Brooks D, and Marques A. Home telemonitoring in COPD: a systematic review of methodologies and patients' adherence. *Int J Med Inform*. 2014;**83**(4):249-63.
18. Antoniadis NC, Rochford PD, Pretto JJ, et al. Pilot study of remote telemonitoring in COPD. *Telemed J E Health*. 2012;**18**(8):634-40.
19. Kim J, Kim S, Kim H, et al., Acceptability of the consumer-centric u-health services for patients with chronic obstructive pulmonary disease. *Telemed J E Health*. 2012;**18**(5):329-38.
20. Sund Z, Powell T, Greenwood R, Jarad NA. Remote daily real-time monitoring in patients with COPD—a feasibility study using a novel device. *Respir Med*. 2009;**103**(9):1320-8.
21. Trappenburg JC, Niesink A, de Weert-van Oene GH, et al. Effects of telemonitoring in patients with chronic obstructive pulmonary disease. *Telemed J E Health*. 2008;**14**(2):138-46.
22. Rozenfeld Y, Hunt JS. Effect of patient withdrawal on a study evaluating pharmacist management of hypertension. *Pharmacotherapy*. 2006;**26**(11):1565-71.
23. Wittes J. Missing inaction: preventing missing outcome data in randomized clinical trials. *J Biopharm Stat*. 2009;**19**(6):957-68.
24. Lewin S, Hendry M, Chandler J, et al. Assessing the complexity of interventions within systematic reviews: development, content and use of a new tool (iCAT\_SR). *BMC Med Res Methodol*. 2017;**17**(76):1-13.
25. Cazzola M, MacNee W, Martinez FJ, Rabe KF. Outcomes for COPD pharmacological trials: from lung function to biomarkers. *Rev Port Pneumol*. 2008;**14**(4):579-83.
26. Almojaibel A., Delivering pulmonary rehabilitation for patients with chronic obstructive pulmonary disease at home using telehealth: A review of the literature. *SJMMS*. 2016;**4**(3):164-171.
27. Cruz J, Brooks D, Marques A. Home telemonitoring in COPD: a systematic review of methodologies and patients' adherence. *Int J Med Inform*. 2014;**83**(4):249-63.
28. Maeder A, Poultney N, Morgan G, Lippiatt R. Patient compliance in home-based self-care telehealth projects. *J Telemed Telecare*. 2015;**21**(8):439-42.
29. Arafah AM, Bouchard V, Mayo NE. Enrolling and keeping participants in multiple sclerosis self-management interventions: A systematic review and meta-analysis. *Clin Rehabil*. 2017;**31**(6):809-23.
30. Sieverink F, Kelders SM, van Gemert-Pijnen JE. Clarifying the Concept of Adherence to eHealth Technology: Systematic Review on When Usage Becomes Adherence. *J Med Internet Res*. 2017;**19**(12):1-15.

Table 1: Telehealth applications and definitions

| Terminology          | Definitions                                                                                                                                                                                                                         |
|----------------------|-------------------------------------------------------------------------------------------------------------------------------------------------------------------------------------------------------------------------------------|
| Telehealth           | Using electronic information and communication technologies to support distance healthcare, which allows healthcare professionals and long-distance patients to exchange information and support access to healthcare services [8]. |
| Telemonitoring       | Using electronic technologies, equipment, and sensors to transfer clinical data from patient settings to the healthcare providers at the clinical settings [8].                                                                     |
| Teleconsultation     | Using videoconferencing and webcams to connect the healthcare provider with patients, allowing the healthcare provider to assess, diagnose, and treat patients [8].                                                                 |
| Tele-education       | Using web-based platforms to educate patients about the patient disease management [8].                                                                                                                                             |
| Telehealth PR        | Using telehealth to deliver pulmonary rehabilitation to COPD patients via communication technologies, and maintain connections between patients and healthcare professionals [8].                                                   |
| Dropout rate         | The number of participants who dropout divided by the number of participants who consented to participate [29].                                                                                                                     |
| Acceptance rate      | The number of participants who consented to participate divided by the number of eligible participant [29].                                                                                                                         |
| Adherence definition | The ability to measure telehealth use and observe the intention to use telehealth technology [30].                                                                                                                                  |



## Appendix 1: Medline (Ovid)

| Searches | Results                                                                        |       |
|----------|--------------------------------------------------------------------------------|-------|
| 1        | telecare.mp.                                                                   | 657   |
| 2        | tele home care.mp.                                                             | 11    |
| 3        | telehealth.mp. or telehealth/                                                  | 18768 |
| 4        | telemonitoring.mp. or telemonitoring/                                          | 1197  |
| 5        | telerehabilitation.mp. or telerehabilitation/                                  | 614   |
| 6        | telemedicine.mp. or telemedicine/                                              | 21271 |
| 7        | home monitoring.mp. or home monitoring/                                        | 1477  |
| 8        | digital monitoring.mp.                                                         | 44    |
| 9        | web-based monitoring.mp.                                                       | 38    |
| 10       | internet-based monitoring.mp.                                                  | 29    |
| 11       | 1 or 2 or 3 or 4 or 5 or 6 or 7 or 8 or 9 or 10                                | 24365 |
| 12       | limit 11 to English                                                            | 22898 |
| 13       | Chronic Obstructive Pulmonary Disease.mp. or chronic obstructive lung disease/ | 52167 |
| 14       | Chronic Obstructive Lung Disease.mp. or chronic obstructive lung disease/      | 34901 |
| 15       | COPD.mp. or chronic obstructive lung disease/                                  | 47721 |
| 16       | 13 or 14 or 15                                                                 | 60027 |
| 17       | 12 and 16                                                                      | 450   |
| 18       | limit 17 to English                                                            | 450   |



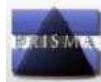

# PRISMA 2009 Checklist

| Section/topic                      | #  | Checklist item                                                                                                                                                                                                                                                                                              | Reported on page # |
|------------------------------------|----|-------------------------------------------------------------------------------------------------------------------------------------------------------------------------------------------------------------------------------------------------------------------------------------------------------------|--------------------|
| <b>TITLE</b>                       |    |                                                                                                                                                                                                                                                                                                             |                    |
| Title                              | 1  | Identify the report as a systematic review, meta-analysis, or both.                                                                                                                                                                                                                                         | 1                  |
| <b>ABSTRACT</b>                    |    |                                                                                                                                                                                                                                                                                                             |                    |
| Structured summary                 | 2  | Provide a structured summary including, as applicable: background; objectives; data sources; study eligibility criteria, participants, and interventions; study appraisal and synthesis methods; results; limitations; conclusions and implications of key findings; systematic review registration number. | 3                  |
| <b>INTRODUCTION</b>                |    |                                                                                                                                                                                                                                                                                                             |                    |
| Rationale                          | 3  | Describe the rationale for the review in the context of what is already known.                                                                                                                                                                                                                              | 5                  |
| Objectives                         | 4  | Provide an explicit statement of questions being addressed with reference to participants, interventions, comparisons, outcomes, and study design (PICOS).                                                                                                                                                  | 5                  |
| <b>METHODS</b>                     |    |                                                                                                                                                                                                                                                                                                             |                    |
| Protocol and registration          | 5  | Indicate if a review protocol exists, if and where it can be accessed (e.g., Web address), and, if available, provide registration information including registration number.                                                                                                                               | 3                  |
| Eligibility criteria               | 6  | Specify study characteristics (e.g., PICOS, length of follow-up) and report characteristics (e.g., years considered, language, publication status) used as criteria for eligibility, giving rationale.                                                                                                      | 6                  |
| Information sources                | 7  | Describe all information sources (e.g., databases with dates of coverage, contact with study authors to identify additional studies) in the search and date last searched.                                                                                                                                  | 6                  |
| Search                             | 8  | Present full electronic search strategy for at least one database, including any limits used, such that it could be repeated.                                                                                                                                                                               | 6                  |
| Study selection                    | 9  | State the process for selecting studies (i.e., screening, eligibility, included in systematic review, and, if applicable, included in the meta-analysis).                                                                                                                                                   | 7                  |
| Data collection process            | 10 | Describe method of data extraction from reports (e.g., piloted forms, independently, in duplicate) and any processes for obtaining and confirming data from investigators.                                                                                                                                  | 7                  |
| Data items                         | 11 | List and define all variables for which data were sought (e.g., PICOS, funding sources) and any assumptions and simplifications made.                                                                                                                                                                       |                    |
| Risk of bias in individual studies | 12 | Describe methods used for assessing risk of bias of individual studies (including specification of whether this was done at the study or outcome level), and how this information is to be used in any data synthesis.                                                                                      | 8                  |
| Summary measures                   | 13 | State the principal summary measures (e.g., risk ratio, difference in means).                                                                                                                                                                                                                               | 8                  |
| Synthesis of results               | 14 | Describe the methods of handling data and combining results of studies, if done, including measures of consistency (e.g., $I^2$ ) for each meta-analysis.                                                                                                                                                   | 8                  |

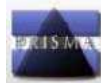

# PRISMA 2009 Checklist

Page 1 of 2

| Section/topic                 | #  | Checklist item                                                                                                                                                                                           | Reported on page # |
|-------------------------------|----|----------------------------------------------------------------------------------------------------------------------------------------------------------------------------------------------------------|--------------------|
| Risk of bias across studies   | 15 | Specify any assessment of risk of bias that may affect the cumulative evidence (e.g., publication bias, selective reporting within studies).                                                             | 8                  |
| Additional analyses           | 16 | Describe methods of additional analyses (e.g., sensitivity or subgroup analyses, meta-regression), if done, indicating which were pre-specified.                                                         | 8                  |
| <b>RESULTS</b>                |    |                                                                                                                                                                                                          |                    |
| Study selection               | 17 | Give numbers of studies screened, assessed for eligibility, and included in the review, with reasons for exclusions at each stage, ideally with a flow diagram.                                          | N/A                |
| Study characteristics         | 18 | For each study, present characteristics for which data were extracted (e.g., study size, PICOS, follow-up period) and provide the citations.                                                             | N/A                |
| Risk of bias within studies   | 19 | Present data on risk of bias of each study and, if available, any outcome level assessment (see item 12).                                                                                                | N/A                |
| Results of individual studies | 20 | For all outcomes considered (benefits or harms), present, for each study: (a) simple summary data for each intervention group (b) effect estimates and confidence intervals, ideally with a forest plot. | N/A                |
| Synthesis of results          | 21 | Present results of each meta-analysis done, including confidence intervals and measures of consistency.                                                                                                  | N/A                |
| Risk of bias across studies   | 22 | Present results of any assessment of risk of bias across studies (see Item 15).                                                                                                                          | N/A                |
| Additional analysis           | 23 | Give results of additional analyses, if done (e.g., sensitivity or subgroup analyses, meta-regression [see Item 16]).                                                                                    | N/A                |
| <b>DISCUSSION</b>             |    |                                                                                                                                                                                                          |                    |
| Summary of evidence           | 24 | Summarize the main findings including the strength of evidence for each main outcome; consider their relevance to key groups (e.g., healthcare providers, users, and policy makers).                     | N/A                |
| Limitations                   | 25 | Discuss limitations at study and outcome level (e.g., risk of bias), and at review-level (e.g., incomplete retrieval of identified research, reporting bias).                                            | N/A                |
| Conclusions                   | 26 | Provide a general interpretation of the results in the context of other evidence, and implications for future research.                                                                                  | N/A                |
| <b>FUNDING</b>                |    |                                                                                                                                                                                                          |                    |
| Funding                       | 27 | Describe sources of funding for the systematic review and other support (e.g., supply of data); role of funders for the systematic review.                                                               | 10                 |

From: Moher D, Liberati A, Tetzlaff J, Altman DG, The PRISMA Group (2009). Preferred Reporting Items for Systematic Reviews and Meta-Analyses: The PRISMA Statement. PLoS Med 6(6): e1000097. doi:10.1371/journal.pmed1000097

For more information, visit: [www.prisma-statement.org](http://www.prisma-statement.org).

Page 2 of 2

For peer review only - <http://bmjopen.bmj.com/site/about/guidelines.xhtml>

# BMJ Open

## Acceptance, adherence, and dropout rates of individuals with COPD approached in telehealth interventions: A protocol for systematic review and meta-analysis

|                                 |                                                                                                                                                                                                                                                                                                                                                                                                                                                                                                                                                                                                                                                                                                                                                                                                                                                                                                            |
|---------------------------------|------------------------------------------------------------------------------------------------------------------------------------------------------------------------------------------------------------------------------------------------------------------------------------------------------------------------------------------------------------------------------------------------------------------------------------------------------------------------------------------------------------------------------------------------------------------------------------------------------------------------------------------------------------------------------------------------------------------------------------------------------------------------------------------------------------------------------------------------------------------------------------------------------------|
| Journal:                        | <i>BMJ Open</i>                                                                                                                                                                                                                                                                                                                                                                                                                                                                                                                                                                                                                                                                                                                                                                                                                                                                                            |
| Manuscript ID                   | bmjopen-2018-026794.R1                                                                                                                                                                                                                                                                                                                                                                                                                                                                                                                                                                                                                                                                                                                                                                                                                                                                                     |
| Article Type:                   | Protocol                                                                                                                                                                                                                                                                                                                                                                                                                                                                                                                                                                                                                                                                                                                                                                                                                                                                                                   |
| Date Submitted by the Author:   | 18-Dec-2018                                                                                                                                                                                                                                                                                                                                                                                                                                                                                                                                                                                                                                                                                                                                                                                                                                                                                                |
| Complete List of Authors:       | Alghamdi, Saeed ; McGill University, School of Physical and Occupational Therapy; Umm Al-Qura University College of Applied Sciences, Department of Respiratory Care<br>Janaudis-Ferreira, Tania; McGill University, School of Physical and Occupational Therapy; McGill University Health Center, Center for outcome research and evaluation (CORE)<br>Alhasani, Rehab; McGill University, School of Physical and Occupational Therapy; Centre de recherche interdisciplinaire en réadaptation, Centre de Réadaptation Constance-Lethbridge, CIUSSS du Centre-Ouest-de-d'île-de-Montréal<br>Boruff, Jill; McGill University, Schulich Library of Science and Engineering<br>Ahmed, Sara; McGill University, School of Physical and Occupational Therapy; Centre de recherche interdisciplinaire en réadaptation, Centre de Réadaptation Constance-Lethbridge, CIUSSS du Centre-Ouest-de-d'île-de-Montréal |
| <b>Primary Subject Heading</b>: | Respiratory medicine                                                                                                                                                                                                                                                                                                                                                                                                                                                                                                                                                                                                                                                                                                                                                                                                                                                                                       |
| Secondary Subject Heading:      | Rehabilitation medicine, Health informatics                                                                                                                                                                                                                                                                                                                                                                                                                                                                                                                                                                                                                                                                                                                                                                                                                                                                |
| Keywords:                       | Systematic review, Meta-analysis, Telemonitoring, Telehealth, Chronic obstructive pulmonary disease, COPD                                                                                                                                                                                                                                                                                                                                                                                                                                                                                                                                                                                                                                                                                                                                                                                                  |
|                                 |                                                                                                                                                                                                                                                                                                                                                                                                                                                                                                                                                                                                                                                                                                                                                                                                                                                                                                            |

SCHOLARONE™  
Manuscripts

1  
2  
3 1 **Title:** Acceptance, adherence, and dropout rates of individuals with COPD approached in  
4 2 telehealth interventions: A protocol for systematic review and meta-analysis  
5 3  
6 4  
7 4  
8 5  
9 6  
10 7

11 8 **Authors**

12 9 Saeed Mardy Alghamdi<sup>1,2,4</sup>, Tania Janaudis-Ferreira<sup>1,4,5</sup>, Rehab Alhasani<sup>1,3,6</sup>, Jill Boruff<sup>1</sup>, Sara  
13 10 Ahmed<sup>1,3,4</sup>

14 11  
15 12  
16 12 **Affiliations**

17 13 1 School of Physical and Occupational Therapy, McGill University, Montreal, QC, Canada

18 14 2 College of Applied Health Science, Umm Al Qura University, Department of Respiratory  
19 15 Care, Makkah, Saudi Arabia

20 16 3 Centre de recherche interdisciplinaire en réadaptation, Constance-Lethbridge Rehabilitation  
21 17 Center, CIUSSS Montréal West, Montréal QC, Canada

22 18 4 Center for Outcome Research and Evaluation (CORE), McGill University Health Center,  
23 19 Montreal, QC, Canada

24 20 5 Translational Research in Respiratory Diseases Program, Research Institute of the McGill  
25 21 University Health Centre, Montreal, Canada

26 22 6 College Of Health and Rehabilitation Sciences, Princess Nourah bint Abdulrahman University,  
27 23 Riyadh, Saudi Arabia

28 24  
29 25 **Corresponding author**

30 26 Dr. Sara Ahmed, School of Physical and Occupational therapy, Faculty of Medicine, McGill  
31 27 University Health Center, Montreal, Quebec, H3G 1Y5, Canada

32 28 Tel: 1 514 398 4400 ext. 00531

33 29 Fax: 1 514 398 6360

34 30 Email: [sara.ahmed@mcgill.ca](mailto:sara.ahmed@mcgill.ca)

35 31  
36 32  
37 33 **Keywords**

38 34 Systematic review, meta-analysis, telehealth, chronic obstructive pulmonary disease, COPD  
39 35

40 36 **Word count**

41 37 2599  
42 38

43 39 **Registration ID number**

44 40 International Prospective Register for Systematic Reviews (PROSPERO) ID number:  
45 41 CRD42017078541  
46 42  
47 43  
48 44  
49 45  
50 46  
51  
52  
53  
54  
55  
56  
57  
58  
59  
60

1  
2  
3  
4  
5  
6  
7  
8  
9  
10  
11  
12  
13  
14  
15  
16  
17  
18  
19  
20  
21  
22  
23  
24  
25  
26  
27  
28  
29  
30  
31  
32  
33  
34  
35  
36  
37  
38  
39  
40  
41  
42  
43  
44  
45  
46  
47  
48  
49  
50  
51  
52  
53  
54  
55  
56  
57  
58  
59  
60

47  
48  
49  
50

For peer review only

## 51 Abstract

52 **Introduction:** Telehealth interventions have the potential of improving exacerbation and health  
53 outcomes for individuals with Chronic Obstructive Pulmonary Disease (COPD), by delivering care  
54 in between clinical visits. However, the precise impact on avoiding exacerbation and reducing the  
55 incidence of hospital readmissions remains inconclusive. This lack of knowledge on the  
56 effectiveness of telehealth for COPD care might be due to non-adherence or partial adherence to  
57 intervention programs and/or the withdrawal of participants over the course of previous studies.

58 **Objectives:** To conduct a systematic review of trials of telehealth interventions (including  
59 Randomized Control Trials, crossover, and pre-post studies) to: (1) estimate the acceptance,  
60 adherence, and dropout rates; (2) identify the reasons for dropout from telehealth interventions  
61 among individuals with COPD; (3) evaluate the impact of trial-related, sociodemographic, and  
62 intervention-related factors on the acceptance, adherence, and dropout rates; and (4) estimate the  
63 extent to which the acceptance, adherence, and dropout rates impact outcomes in comparison with  
64 usual monitoring.

65 **Methods and analysis:** A systematic literature review of four databases from earliest records to  
66 November 2018 will be carried out using CINAHL, Medline (Ovid), Cochrane Library, and  
67 Embase. Randomized and non-randomized control studies will be included, in addition to  
68 crossover and pre-post studies comparing telehealth with standard monitoring among individuals  
69 with COPD only. Two independent reviewers will screen all relevant abstracts and full-text studies  
70 to determine eligibility, assess the risk of bias, and extract the data using structured forms. If the  
71 included studies are sufficiently homogenous in terms of interventions, populations, and  
72 objectives, a meta-analysis will be performed.

## 75 Ethics and dissemination

76 Ethical considerations are not required for this research.

## 78 Registration

79 This systematic review and meta-analysis is registered in the Prospero Registry  
80 (CRD42017078541)

## 82 Word count

83 248

84

85

86

### Strengths and limitations

- This systematic review aims to objectively estimate the acceptance, adherence, and dropout rates of people with COPD enrolled in telehealth interventions, and the associated variables that potentially impact or are impacted by these rates.
- This systematic review will update existing knowledge on trial-related, patient-related, and intervention-related factors potentially influencing acceptance, adherence, and dropout rates.
- Exploring acceptance, adherence, and dropout rates in COPD telehealth care and the associated factors will allow future researchers to design prospective clinical trials, while increasing the validity and generalizability of their results.
- The exclusion of papers written in languages other than English might leave relevant studies out of the review.

## 102 INTRODUCTION

103 According to the Global Initiative for Chronic Obstructive Lung Disease (GOLD), *chronic*  
104 *obstructive pulmonary disease (COPD) is a common disease characterized by the persistent*  
105 *limitation of airflow to the lungs. It can be prevented and treated; furthermore, it is progressive in*  
106 *nature and associated with enhanced chronic inflammatory responses (in the airways and lungs)*  
107 *to noxious gases* [1]. Airflow limitations in COPD can lead to respiratory exacerbation which is  
108 defined as *an acute worsening of respiratory symptoms* [1]. Exacerbations can negatively impact  
109 an individual's health status, often resulting in hospitalization [2, 3]. COPD is a major public health  
110 problem, and individuals with COPD require appropriate management strategies to minimize the  
111 likelihood of hospitalization [4].

113 Telehealth refers to the use of electronic information and communication technologies to support  
114 distance healthcare, which allows healthcare professionals and long-distance patients to exchange  
115 information and enable access to healthcare services. Various terms are used throughout the  
116 medical industry to reference specific applications and use cases for telehealth – these are  
117 presented in Table 1 [5]. For example, telehealth interventions with COPD could be used to deliver  
118 care and it can help to detect exacerbations at an early stage, minimizing the potential for  
119 emergency admissions and facilitating self-management [5-8]. Telehealth is also used for remote  
120 monitoring of a patient's clinical data, such as their vital signs; this enables healthcare teams to  
121 identify disease deterioration at an early stage and provide the requisite care in a timely manner.  
122 This has the effect of helping individuals manage their diseases and for facilitating early detection  
123 of disease exacerbation [9]. There is growing evidence that telehealth may be a useful tool for  
124 minimizing hospital admissions due to respiratory exacerbations, particularly in the case of  
125 individuals who are constrained by geographical barriers, or have limited access to healthcare  
126 services [5, 10]. Clinical trials have shown that individuals with COPD have positive attitudes  
127 towards participating in telehealth and that telehealth can promote patients' independence toward  
128 self-management [11-17]. However, the precise impact of telehealth on avoiding exacerbation and  
129 reducing hospital readmissions remains inconclusive [5]. The uncertainty about the impact of  
130 telehealth may be due to non-adherence or partial adherence to intervention techniques as well as  
131 the withdrawal of participants over the course of previous studies [18]. Dropout rates for telehealth  
132 vary across clinical trials [6, 19-22]. It is unclear which variables are most strongly associated with  
133 non-adherence and withdrawal, although possible factors may be related to participant  
134 characteristics, intervention characteristics, and the context and environment in which the  
135 intervention is delivered. Understanding the characteristics of individuals with COPD, features of  
136 the interventions undertaken, and the environment of clinical trials is essential for reducing dropout  
137 rates in future studies. Such understanding will help with designing prospective clinical trials,  
138 while also increasing the validity and generalizability of their results [23, 24]. Evaluating the  
139 reasons that prevent individuals with COPD from enrolling and completing telehealth  
140 interventions may help clinicians appropriately tailor interventions to the individuals' needs and  
141 limit dropout rates [18, 23]. Moreover, researchers can explore individual's preferences and use  
142 them to develop more desirable and feasible telehealth interventions.

## 144 OBJECTIVES

145 The objectives of this systematic review are to:

146 (1) estimate acceptance, adherence, and dropout rates in trials of telehealth interventions (including  
147 Randomized Control Trials, crossover, and pre-post studies);



- 1  
2  
3 148 (2) identify the reasons for dropout from the intervention;  
4 149 (3) estimate the impact of trial-related factors, sociodemographic factors, and intervention-related  
5 150 factors on acceptance, adherence, and dropout rates;  
6 151 (4) estimate the extent to which acceptance, adherence, and dropout rates affect patient's  
7 152 outcomes.  
8 153

## 10 154 **METHODS**

11 155 This systematic review and meta-analysis is registered with the Prospero Registry  
12 156 (CRD42017078541). This systematic review will be conducted according to the Preferred  
13 157 Reporting Items for Systematic reviewer and Meta-Analysis Protocols (PRISMA-P).  
14 158

### 16 159 **Patient and Public Involvement**

17 160 Patients and or public were not involved in this systematic review.  
18 161  
19 162  
20 163

### 22 164 **Inclusion criteria**

- 23 165 (1) Study type: randomized or non-randomized control trials, observational single arm pre-post  
24 166 trials, and crossover clinical trials;  
25 167 (2) Population: studies including individuals diagnosed with COPD based on reported FEV1%  
26 168 will be considered for this review;  
27 169 (3) Type of intervention: this review includes any information technology tool designed for the  
28 170 clinical support of patients with COPD involving the remote exchange of data between a patient  
29 171 and a health care professional. This includes, for example, telehealth, telecare, telehomecare, e-  
30 172 health, telemonitoring, telerehabilitation, telemedicine, home monitoring, digital monitoring, web-  
31 173 based monitoring, or internet-based monitoring as part of a COPD-management plan.  
32 174 (4) Type of outcome: outcomes include health-related quality of life, adherence to the action plan,  
33 175 exacerbations, duration of hospital stay, hospitalization or utilization of health services (including  
34 176 COPD related cost), and exercise capacity.  
35 177

### 38 178 **Exclusion criteria**

- 39 179 (1) Trials not published in English;  
40 180 (2) Studies that do not describe the telehealth intervention researched, including delivery methods,  
41 181 mode of administration, and frequency of data transmissions;  
42 182 (3) Studies that do not report the number of individuals who were approached, who gave their  
43 183 consent, and who dropped out.  
44 184

## 46 185 **SEARCH STRATEGY**

### 47 186 **Electronic databases**

48 187 A systematic search of the following databases from earliest records to November 2018 will be  
49 188 undertaken to identify relevant articles: CINAHL; Medline (Ovid); Cochrane Library, and  
50 189 Embase. The following Medical Subject Headings (MeSH terms), subject headings, and keywords  
51 190 or combinations thereof will be used: telecare; telehomecare; telehealth; e-health; telemonitoring;  
52 191 telerehabilitation; telemedicine; home monitoring; digital monitoring; web-based monitoring;  
53 192 internet-based monitoring; Chronic Obstructive Pulmonary Disease; Chronic Obstructive lung  
54 193 disease, and COPD. The search strategy was developed in collaboration with a health sciences  
55 193  
56  
57  
58  
59  
60

1  
2  
3 194 librarian (JB), to ensure the involvement of appropriate and necessary keywords in the review.  
4 195 Keywords and subject terms will be customized for each database. Further, all words with the  
5 196 prefix “tele-” will be searched both with and without a hyphen (e.g., both “tele-monitoring” and  
6 197 “telemonitoring”). The search strategies from Medline (Ovid) are presented in Appendix 1.  
7 198

### 9 199 **Manual literature search**

10 200 We will perform manual searches of reference lists of all relevant primary studies and systematic  
11 201 reviews to identify any additional studies that were not captured by our original search.  
12 202

### 13 203 **Reference manager**

14 204 All articles will be imported to EndNote software and any duplicates removed.  
15 205

### 16 206 **Search procedures**

17 207 The search will be performed by two team members (SA, JB), after which all articles will be  
18 208 imported to EndNote version 7.7 and any duplicates removed. All article titles and abstracts will  
19 209 be screened by two independent reviewers. A manual search of the reference lists of relevant  
20 210 studies shall be undertaken, to identify any additional articles that were missed by the database  
21 211 search but that might be suitable for inclusion in the review. Subsequently a full-text review of all  
22 212 the included articles will be carried out. Disagreements between reviewers will be resolved through  
23 213 discussion. If no consensus can be reached, a third reviewer’s decision will be considered. Any  
24 214 study that does not meet the inclusion criteria will be excluded and the reasons for exclusion  
25 215 recorded according to the PRISMA flowchart.  
26 216

### 27 217 **Study selection and data extraction**

28 218 A data extraction form will be created using an Excel sheet. Two independent reviewers will  
29 219 perform the data extraction. First, reviewers will pilot the data extraction form based on ten  
30 220 included studies. Second, any disagreement between reviewers at this stage will be resolved by  
31 221 consensus. If no consensus can be reached, a third reviewer will make the decision. The first  
32 222 reviewer will then start extracting data. The second reviewer will check the consistency of the data  
33 223 and identify any errors. In case information is missing from an included study’s published  
34 224 manuscript, its authors will be contacted and asked for clarification.  
35 225

### 36 226 **Data extraction and data management**

37 227 Data related to the study characteristics, population characteristics, and intervention  
38 228 characteristics, as defined in the intervention Complexity Assessment Tool for Systematic  
39 229 Reviews (iCAT-SR), shall be extracted [25].  
40 230

41 231 Study characteristics: authors’ names; year of publication; country; research design, as well as  
42 232 recruitment methods.  
43 233

44 234 Population characteristics: age; gender; level of education; GOLD grade and/or Forced Expiratory  
45 235 Volume in one second as a percentage of predicted (FEV1%); smoking history; number of COPD  
46 236 patients who consented to participate, were approached, dropped out, and completed the study, as  
47 237 well as reasons for dropout.  
48 238

239 Intervention characteristics: settings, methods, frequency and components of telehealth (active  
240 elements, targeted behavior, targeted users, the degree of tailoring, health professional assistance),  
241 and duration of intervention.

## 242 243 **OUTCOMES**

244 All reported outcomes of COPD will be extracted, as will the effect size (ES) of telehealth  
245 intervention on these outcomes. The ES will be calculated if it is not mentioned by the author(s).  
246 ES calculation will be performed according to results from the first post-interventional evaluation,  
247 which will reflect the earliest impact of telehealth interventions on outcomes. Any results after the  
248 first post-interventional evaluation (e.g., results from multiple follow-up points) will not be  
249 considered in the ES calculation. Also, the ES on the main outcome will be included in the analysis  
250 if the studies have more than one outcome.

### 251 252 **Outcomes**

253 Outcomes extracted from each study:

254 All primary and secondary outcomes defined by each study will be extracted. These include, but  
255 are not limited to:

256  
257 Hospitalization: admissions due to exacerbations and causes of hospitalization will be reported.  
258 Attention shall be paid to differences between count and dichotomous data (e.g., the count of  
259 participants in each group who experience at least one exacerbation event vs. number of events  
260 per intervention group).

261  
262 Exacerbation rate is a commonly reported outcome [26]. As exacerbations can be reported in  
263 different ways, the data collection allows for the following numbers to be recorded: number of  
264 exacerbations or exacerbation rate (that may also be classified based on the patient disease  
265 severity), all-cause mortality, and number of patients per study group who died during the survey.

266  
267 Adherence to the Action Plan: (including any measurement mentioned by the authors to report the  
268 adherence to the action plan – e.g., adherence to intervention, adherence to physiological  
269 monitoring, adherence to symptom monitoring, adherence to medication, adherence to exercise,  
270 and adherence telehealth and/or telemonitoring)

271  
272 Health-related quality of life: disease-specific or non-disease-specific quality of life reported by a  
273 validated instrument.

274  
275 Physical activity measurements (any type reported by a validated measurement system).

276  
277 Outcome of adherence for this review:

278 Outcomes of this review are acceptance, adherence, and dropout rates. When these outcomes are  
279 not reported in the original studies, we will calculate the rates as follows:

280 The acceptance rate will be calculated by taking the total number of participants who accepted,  
281 agreed, and consented to participate in this study and dividing it by the number of participants who  
282 were approached for involvement in telehealth intervention. The adherence rate will be calculated  
283 as the total number of participants who completed the telehealth intervention according to the study  
284 protocol divided by the number who started the intervention. The dropout rate will be calculated

285 as number of participants who withdrew from or did not continue with the intervention divided by  
286 the number of participants who consented to participate on the study. All rates will be presented  
287 using an overall average.

### 291 **Risk of bias assessment**

292 Two team members (SA, RA) will independently assess the risk of bias for each study included in  
293 the review; the Cochrane Collaboration Risk of Bias criteria will be used for randomized clinical  
294 trials (RCTs), and SIGN checklist will be used for observational studies. Reviewers will  
295 independently report justifications and comments for their decisions. A third team member will be  
296 consulted to resolve any discrepancies. The AMSTAR II tool will be used to assess the risk of bias  
297 for the systematic review.

### 299 **DATA ANALYSIS**

301 Statistical Analysis System (SAS) software will be used to run regression models. Possible  
302 variables associated with rates will be categorized and tested using the univariate analysis model.  
303 Subsequently, a random effect meta regression analysis will be used to estimate the effects of the  
304 participant, study, and intervention characteristics on acceptance, adherence, dropout rates. A  
305 separate model analysis will be conducted for each rate. If we are restricted in this regard and  
306 unable to perform a meta-analysis, we will synthesize and summarize the results narratively.

### 308 **Dealing with missing data**

309 Authors will be contacted to obtain any unreported data.

### 311 **DISCUSSION**

312 This systematic review aims to objectively estimate the acceptance, adherence, and dropout rates  
313 of COPD populations enrolled in telehealth and the associated variables that might affect or be  
314 affected by these rates. It will help identify the extent to which associated variables can be used  
315 for an improved design of clinical trials, to suggest the characteristics of associated target  
316 populations, and to recommend elements for inclusion in telehealth intervention to support self-  
317 management.

319 To the best of our knowledge, this will be the first systematic review estimating acceptance,  
320 adherence, and dropout rates of COPD populations participating in telehealth , as well as the  
321 associated factors influencing these rates. Previous systematic reviews were unable to provide  
322 information about effective elements contributing to better acceptance, adherence and dropout  
323 rates using meta-regression analysis; in contrast, the current study will try to explore elements of  
324 telehealth that impact acceptance, adherence, and dropout rates [27, 28]. Our systematic review  
325 will analyze the literature using meta-analysis, and in doing so provide the advantage of having an  
326 opportunity to investigate and understand the correlation between pertinent factors and acceptance,  
327 adherence, and dropout rates. We will provide specific information about the trials' characteristics  
328 (RCTs vs. non-RCTs), population characteristics (i.e. mild severity vs. moderate severity), and  
329 intervention characteristics (i.e., primary care settings vs. specialty care settings), as well as how  
330 such information may facilitate users' adherence to telehealth interventions.

1  
2  
3 331  
4 332 Furthermore, existing evidence on acceptance, adherence, and dropout rates will inform methods  
5 333 for designing future telehealth projects focusing on COPD. This study may also be beneficial for  
6 334 the management of grants for research in the field [29]. It will contribute to future research by  
7 335 identifying the target populations among which telehealth are accepted, and identify feasible  
8 336 interventions. Finally, this systematic review will help tailor technological interventions to more  
9 337 effectively meet the needs of COPD patients.  
10 338

### 11 339 **Ethics and dissemination**

12 340 This systematic review requires no ethics approval. This research will use no confidential or  
13 341 personal patient data. Findings will be disseminated through publication in a peer-reviewed  
14 342 specific journal.  
15 343  
16 344  
17 345

### 18 346 **Authors' contributions**

19 347 SM, SA, TF, RA developed the idea and designed the study protocol. SM, SA, JB designed and  
20 348 wrote the search strategy and the first protocol draft; SM, SA, RA planned the data extraction  
21 349 and statistical analysis; SA, TF, RA, JB, provided critical insights. All authors have approved  
22 350 and contributed to  
23 351 the final written manuscript  
24 352

### 25 353 **Acknowledgements**

26 354 The authors thank the reviewers of the manuscript for their constructive feedback.  
27 355  
28 356

### 29 357 **Funding**

30 358 The main author disclosed receipt of the following financial support for the research, authorship,  
31 359 and/or publication of this article. This study was supported by a scholarship from Umm Al Qura  
32 360 University in Saudi Arabia, Sara Ahmed and Tania Janaudis-Ferreira are supported by Fonds de  
33 361 recherche Santé (FRQS) career award.  
34 362

### 35 363 **Competing Interests**

36 364 There are no competing interests for any author  
37 365  
38  
39  
40  
41  
42  
43  
44  
45  
46  
47  
48  
49  
50  
51  
52  
53  
54  
55  
56  
57  
58  
59  
60



## 366 REFERENCES

- 367 1. GOLD, G.I.f.C.O.L.D., *Diagnosis of Disease of Chronic Airflow Limitation: Asthma, COPD and Asthma-COPD Overlap Syndrome (ACOS)*. 2017: Global Initiative for  
369 Chronic Obstructive Lung Disease GOLD. p. 18.
- 370 2. Fletcher, M.J., et al., *COPD uncovered: an international survey on the impact of chronic  
371 obstructive pulmonary disease [COPD] on a working age population*. BMC Public  
372 Health, 2011. **11**(1): p. 612.
- 373 3. Halbert, R., et al., *Global burden of COPD: systematic review and meta-analysis*.  
374 European Respiratory Journal, 2006. **28**(3): p. 523-532.
- 375 4. Yang, F., et al., *Continuity of Care to Prevent Readmissions for Patients with Chronic  
376 Obstructive Pulmonary Disease: A Systematic Review and Meta-Analysis*. COPD, 2017.  
377 **14**(2): p. 251-261.
- 378 5. Selzler, A., et al., *Telehealth pulmonary rehabilitation: A review of the literature and an  
379 example of a nationwide initiative to improve the accessibility of pulmonary  
380 rehabilitation*. Chronic Respiratory Disease, 2018: **15**(1): p. 41-47.
- 381 6. Chau, J.P.-C., et al., *A feasibility study to investigate the acceptability and potential  
382 effectiveness of a telecare service for older people with chronic obstructive pulmonary  
383 disease*. International Journal of Medical Informatics, 2012. **81**(10): p. 674-682.
- 384 7. Cox, N.S., et al., *Pulmonary rehabilitation referral and participation are commonly  
385 influenced by environment, knowledge, and beliefs about consequences: a systematic  
386 review using the Theoretical Domains Framework*. Journal of Physiotherapy, 2017.  
387 **63**(2): p. 84-93.
- 388 8. Paré, G., M. Jaana, and C. Sicotte, *Systematic review of home telemonitoring for chronic  
389 diseases: the evidence base*. Journal of the American Medical Informatics Association,  
390 2007. **14**(3): p. 269-277.
- 391 9. Crist, T.M., S.B. Kaufman, and K.R. Crampton, *Home telemedicine: a home health care  
392 agency strategy for maximizing resources*. Journal of Home Health Care Practice, 1996.  
393 **8**(4): p. 1-9.
- 394 10. McKinstry, B., *The use of remote monitoring technologies in managing chronic  
395 obstructive pulmonary disease*. QJM: An International Journal of Medicine, 2013.  
396 **106**(10): p. 883-885.
- 397 11. Almojaibel, A.A., *Delivering pulmonary rehabilitation for patients with chronic  
398 obstructive pulmonary disease at home using telehealth: A review of the literature*. Saudi  
399 Journal of Medicine and Medical Sciences, 2016. **4**(3): p. 164.
- 400 12. Burkow, T.M., et al., *Internet-enabled pulmonary rehabilitation and diabetes education  
401 in group settings at home: a preliminary study of patient acceptability*. BMC Medical  
402 Informatics and Decision Making, 2013. **13**(1): p. 33.
- 403 13. Holland, A.E., et al., *Telerehabilitation for people with chronic obstructive pulmonary  
404 disease: feasibility of a simple, real time model of supervised exercise training*. Journal of  
405 Telemedicine and Telecare, 2013. **19**(4): p. 222-226.
- 406 14. Paneroni, M., et al., *Is telerehabilitation a safe and viable option for patients with  
407 COPD? A feasibility study*. COPD: Journal of Chronic Obstructive Pulmonary Disease,  
408 2015. **12**(2): p. 217-225.
- 409

- 1  
2  
3 410 15. Tabak, M., et al., *A telehealth program for self-management of COPD exacerbations and*  
4 411 *promotion of an active lifestyle: a pilot randomized controlled trial.* International Journal  
5 412 of Chronic Obstructive Pulmonary Disease, 2014. **9**: p. 935.
- 6 413 16. Zanaboni, P., et al., *Long-term telerehabilitation of COPD patients in their homes:*  
7 414 *interim results from a pilot study in Northern Norway.* Journal of Telemedicine and  
8 415 Telecare, 2013. **19**(7): p. 425-429.
- 9 416 17. Pinnock, H., et al., *P33 'Light Touch' Telemonitoring For People With COPD In Lothian:*  
10 417 *A Pilot Evaluation With Nested Qualitative Study.* 2014, BMJ Publishing Group Ltd.
- 11 418 18. Cruz, J., D. Brooks, and A. Marques, *Home telemonitoring in COPD: a systematic*  
12 419 *review of methodologies and patients' adherence.* International Journal of Medical  
13 420 Informatics, 2014. **83**(4): p. 249-263.
- 14 421 19. Antoniadis, N.C., et al., *Pilot study of remote telemonitoring in COPD.*  
15 422 *TELEMEDICINE and e-HEALTH*, 2012. **18**(8): p. 634-640.
- 16 423 20. Kim, J., et al., *Acceptability of the consumer-centric u-health services for patients with*  
17 424 *chronic obstructive pulmonary disease.* Telemedicine and e-Health, 2012. **18**(5): p. 329-  
18 425 338.
- 19 426 21. Sund, Z., et al., *Remote daily real-time monitoring in patients with COPD—a feasibility*  
20 427 *study using a novel device.* Respiratory Medicine, 2009. **103**(9): p. 1320-1328.
- 21 428 22. Trappenburg, J.C., et al., *Effects of telemonitoring in patients with chronic obstructive*  
22 429 *pulmonary disease.* Telemedicine and e-Health, 2008. **14**(2): p. 138-146.
- 23 430 23. Rozenfeld, Y. and J.S. Hunt, *Effect of patient withdrawal on a study evaluating*  
24 431 *pharmacist management of hypertension.* Pharmacotherapy: The Journal of Human  
25 432 Pharmacology and Drug Therapy, 2006. **26**(11): p. 1565-1571.
- 26 433 24. Wittes, J., *Missing inaction: preventing missing outcome data in randomized clinical*  
27 434 *trials.* Journal of Biopharmaceutical Statistics, 2009. **19**(6): p. 957-968.
- 28 435 25. Lewin, S., et al., *Assessing the complexity of interventions within systematic reviews:*  
29 436 *development, content and use of a new tool (iCAT\_SR).* BMC Medical Research  
30 437 Methodology, 2017. **17**(1): p. 76.
- 31 438 26. Cazzola, M., et al., *Outcomes for COPD pharmacological trials: from lung function to*  
32 439 *biomarkers.* European Respiratory Journal, 2008. **31**(2): p. 416-69.
- 33 440 27. Almojaibel, A., *Delivering pulmonary rehabilitation for patients with chronic obstructive*  
34 441 *pulmonary disease at home using telehealth: A review of the literature.* Saudi Journal of  
35 442 Medicine and Medical Sciences, 2016. **4**(3): p. 164-171.
- 36 443 28. Cruz, J., D. Brooks, and A. Marques, *Home telemonitoring in COPD: a systematic*  
37 444 *review of methodologies and patients' adherence.* International Journal of Medical  
38 445 Informatics, 2014. **83**(4): p. 249-263.
- 39 446 29. Maeder, A., et al., *Patient compliance in home-based self-care telehealth projects.*  
40 447 *Journal of Telemedicine and Telecare*, 2015. **21**(8): p. 439-442.
- 41 448 30. Sood, S., et al., *What is telemedicine? A collection of 104 peer-reviewed perspectives and*  
42 449 *theoretical underpinnings.* Telemedicine and e-Health, 2007. **13**(5): p. 573-590.
- 43 450 31. Huniche, L., et al., *Empowering patients with COPD using tele-homecare technology.*  
44 451 *Studies in Health Technology and Informatics*, 2010. **155**: p. 48-54.
- 45 452 32. Arafah, A.M., V. Bouchard, and N.E. Mayo, *Enrolling and keeping participants in*  
46 453 *multiple sclerosis self-management interventions: A systematic review and meta-analysis.*  
47 454 *Clinical Rehabilitation*, 2017. **31**(6): p. 809-823.
- 48  
49  
50  
51  
52  
53  
54  
55  
56  
57  
58  
59  
60

1  
2  
3  
4  
5  
6  
7  
8  
9  
10  
11  
12  
13  
14  
15  
16  
17  
18  
19  
20  
21  
22  
23  
24  
25  
26  
27  
28  
29  
30  
31  
32  
33  
34  
35  
36  
37  
38  
39  
40  
41  
42  
43  
44  
45  
46  
47  
48  
49  
50  
51  
52  
53  
54  
55  
56  
57  
58  
59  
60

33. Sieverink, F., S.M. Kelders, and J.E. van Gemert-Pijnen, *Clarifying the Concept of Adherence to eHealth Technology: Systematic Review on When Usage Becomes Adherence*. Journal of Medical Internet Research, 2017. **19**(12): e402.

For peer review only



461 Table 1: Telehealth applications and definitions

462

| Terminology          | Definitions                                                                                                                                                                                                                         |
|----------------------|-------------------------------------------------------------------------------------------------------------------------------------------------------------------------------------------------------------------------------------|
| Telehealth           | Using electronic information and communication technologies to support distance healthcare, which allows healthcare professionals and long-distance patients to exchange information and support access to healthcare services [5]. |
| Telemonitoring       | Using electronic technologies, equipment, and sensors to transfer clinical data from patient settings to the healthcare providers at the clinical settings [5].                                                                     |
| Telemedicine         | Using e-health and communications networks for the delivery of healthcare services and medical education from one geographical location to another [30]                                                                             |
| Telehomecare         | Using electronic information and communication technologies to support care and treatment between a patient's home and professional healthcare settings [31].                                                                       |
| Teleconsultation     | Using videoconferencing and webcams to connect the healthcare provider with patients, allowing the healthcare provider to assess, diagnose, and treat patients [5].                                                                 |
| Tele-education       | Using web-based platforms to educate patients about the patient disease management [5].                                                                                                                                             |
| Telehealth PR        | Using telehealth to deliver pulmonary rehabilitation to COPD patients via communication technologies, and maintain connections between patients and healthcare professionals [5].                                                   |
| Dropout rate         | The number of participants who dropout divided by the number of participants who consented to participate [32].                                                                                                                     |
| Acceptance rate      | The number of participants who consented to participate divided by the number of eligible participant [32].                                                                                                                         |
| Adherence definition | The ability to measure telehealth use and observe the intention to use telehealth technology [33].                                                                                                                                  |

463

464

465

## Appendix 1: Medline (Ovid)

| Searches | Results                                                                        |       |
|----------|--------------------------------------------------------------------------------|-------|
| 1        | telecare.mp.                                                                   | 657   |
| 2        | tele home care.mp.                                                             | 11    |
| 3        | telehealth.mp. or telehealth/                                                  | 18768 |
| 4        | telemonitoring.mp. or telemonitoring/                                          | 1197  |
| 5        | telerehabilitation.mp. or telerehabilitation/                                  | 614   |
| 6        | telemedicine.mp. or telemedicine/                                              | 21271 |
| 7        | home monitoring.mp. or home monitoring/                                        | 1477  |
| 8        | digital monitoring.mp.                                                         | 44    |
| 9        | web-based monitoring.mp.                                                       | 38    |
| 10       | internet-based monitoring.mp.                                                  | 29    |
| 11       | 1 or 2 or 3 or 4 or 5 or 6 or 7 or 8 or 9 or 10                                | 24365 |
| 12       | limit 11 to English                                                            | 22898 |
| 13       | Chronic Obstructive Pulmonary Disease.mp. or chronic obstructive lung disease/ | 52167 |
| 14       | Chronic Obstructive Lung Disease.mp. or chronic obstructive lung disease/      | 34901 |
| 15       | COPD.mp. or chronic obstructive lung disease/                                  | 47721 |
| 16       | 13 or 14 or 15                                                                 | 60027 |
| 17       | 12 and 16                                                                      | 450   |
| 18       | limit 17 to English                                                            | 450   |

## PRISMA-P 2015 Checklist

This checklist has been adapted for use with protocol submissions to *Systematic Reviews* from Table 3 in Moher D et al: Preferred reporting items for systematic review and meta-analysis protocols (PRISMA-P) 2015 statement. *Systematic Reviews* 2015 4:1

| Section/topic                     | #  | Checklist item                                                                                                                                                                                  | Information reported     |                          | Line number(s) |
|-----------------------------------|----|-------------------------------------------------------------------------------------------------------------------------------------------------------------------------------------------------|--------------------------|--------------------------|----------------|
|                                   |    |                                                                                                                                                                                                 | Yes                      | No                       |                |
| <b>ADMINISTRATIVE INFORMATION</b> |    |                                                                                                                                                                                                 |                          |                          |                |
| <b>Title</b>                      |    |                                                                                                                                                                                                 |                          |                          |                |
| Identification                    | 1a | Identify the report as a protocol of a systematic review                                                                                                                                        | <input type="checkbox"/> | <input type="checkbox"/> | 3              |
| Update                            | 1b | If the protocol is for an update of a previous systematic review, identify as such                                                                                                              | <input type="checkbox"/> | <input type="checkbox"/> |                |
| <b>Registration</b>               | 2  | If registered, provide the name of the registry (e.g., PROSPERO) and registration number in the Abstract                                                                                        | <input type="checkbox"/> | <input type="checkbox"/> | 37 -39         |
| <b>Authors</b>                    |    |                                                                                                                                                                                                 |                          |                          |                |
| Contact                           | 3a | Provide name, institutional affiliation, and e-mail address of all protocol authors; provide physical mailing address of corresponding author                                                   | <input type="checkbox"/> | <input type="checkbox"/> | 23-28          |
| Contributions                     | 3b | Describe contributions of protocol authors and identify the guarantor of the review                                                                                                             | <input type="checkbox"/> | <input type="checkbox"/> | 401 -409       |
| <b>Amendments</b>                 | 4  | If the protocol represents an amendment of a previously completed or published protocol, identify as such and list changes; otherwise, state plan for documenting important protocol amendments | <input type="checkbox"/> | <input type="checkbox"/> |                |
| <b>Support</b>                    |    |                                                                                                                                                                                                 |                          |                          |                |
| Sources                           | 5a | Indicate sources of financial or other support for the review                                                                                                                                   | <input type="checkbox"/> | <input type="checkbox"/> | 399 -403       |
| Sponsor                           | 5b | Provide name for the review funder and/or sponsor                                                                                                                                               | <input type="checkbox"/> | <input type="checkbox"/> | 399-403        |
| Role of sponsor/funder            | 5c | Describe roles of funder(s), sponsor(s), and/or institution(s), if any, in developing the protocol                                                                                              | <input type="checkbox"/> | <input type="checkbox"/> | 399-403        |
| <b>INTRODUCTION</b>               |    |                                                                                                                                                                                                 |                          |                          |                |
| <b>Rationale</b>                  | 6  | Describe the rationale for the review in the context of what is already known                                                                                                                   | <input type="checkbox"/> | <input type="checkbox"/> | 133 -142       |
| <b>Objectives</b>                 | 7  | Provide an explicit statement of the question(s) the review will address with reference to participants, interventions, comparators, and outcomes (PICO)                                        | <input type="checkbox"/> | <input type="checkbox"/> | 151- 174       |
| <b>METHODS</b>                    |    |                                                                                                                                                                                                 |                          |                          |                |

| Section/topic                             | #   | Checklist item                                                                                                                                                                                                                              | Information reported     |                          | Line number(s) |
|-------------------------------------------|-----|---------------------------------------------------------------------------------------------------------------------------------------------------------------------------------------------------------------------------------------------|--------------------------|--------------------------|----------------|
|                                           |     |                                                                                                                                                                                                                                             | Yes                      | No                       |                |
| <b>Eligibility criteria</b>               | 8   | Specify the study characteristics (e.g., PICO, study design, setting, time frame) and report characteristics (e.g., years considered, language, publication status) to be used as criteria for eligibility for the review                   | <input type="checkbox"/> | <input type="checkbox"/> | 181 -193       |
| <b>Information sources</b>                | 9   | Describe all intended information sources (e.g., electronic databases, contact with study authors, trial registers, or other grey literature sources) with planned dates of coverage                                                        | <input type="checkbox"/> | <input type="checkbox"/> | 204 -206       |
| <b>Search strategy</b>                    | 10  | Present draft of search strategy to be used for at least one electronic database, including planned limits, such that it could be repeated                                                                                                  | <input type="checkbox"/> | <input type="checkbox"/> | 214            |
| <b>STUDY RECORDS</b>                      |     |                                                                                                                                                                                                                                             |                          |                          |                |
| Data management                           | 11a | Describe the mechanism(s) that will be used to manage records and data throughout the review                                                                                                                                                | <input type="checkbox"/> | <input type="checkbox"/> | 231 - 239      |
| Selection process                         | 11b | State the process that will be used for selecting studies (e.g., two independent reviewers) through each phase of the review (i.e., screening, eligibility, and inclusion in meta-analysis)                                                 | <input type="checkbox"/> | <input type="checkbox"/> | 241 -248       |
| Data collection process                   | 11c | Describe planned method of extracting data from reports (e.g., piloting forms, done independently, in duplicate), any processes for obtaining and confirming data from investigators                                                        | <input type="checkbox"/> | <input type="checkbox"/> | 250 -265       |
| <b>Data items</b>                         | 12  | List and define all variables for which data will be sought (e.g., PICO items, funding sources), any pre-planned data assumptions and simplifications                                                                                       | <input type="checkbox"/> | <input type="checkbox"/> | 250 -265       |
| <b>Outcomes and prioritization</b>        | 13  | List and define all outcomes for which data will be sought, including prioritization of main and additional outcomes, with rationale                                                                                                        | <input type="checkbox"/> | <input type="checkbox"/> | 270 - 313      |
| <b>Risk of bias in individual studies</b> | 14  | Describe anticipated methods for assessing risk of bias of individual studies, including whether this will be done at the outcome or study level, or both; state how this information will be used in data synthesis                        | <input type="checkbox"/> | <input type="checkbox"/> | 228 – 333      |
| <b>DATA</b>                               |     |                                                                                                                                                                                                                                             |                          |                          |                |
| <b>Synthesis</b>                          | 15a | Describe criteria under which study data will be quantitatively synthesized                                                                                                                                                                 | <input type="checkbox"/> | <input type="checkbox"/> | 337 – 342      |
|                                           | 15b | If data are appropriate for quantitative synthesis, describe planned summary measures, methods of handling data, and methods of combining data from studies, including any planned exploration of consistency (e.g., $I^2$ , Kendall's tau) | <input type="checkbox"/> | <input type="checkbox"/> | 337 – 342      |
|                                           | 15c | Describe any proposed additional analyses (e.g., sensitivity or subgroup analyses, meta-regression)                                                                                                                                         | <input type="checkbox"/> | <input type="checkbox"/> | 337 – 342      |
|                                           | 15d | If quantitative synthesis is not appropriate, describe the type of summary planned                                                                                                                                                          | <input type="checkbox"/> | <input type="checkbox"/> | 337 – 342      |
| <b>Meta-bias(es)</b>                      | 16  | Specify any planned assessment of meta-bias(es) (e.g., publication bias across studies, selective reporting within studies)                                                                                                                 | <input type="checkbox"/> | <input type="checkbox"/> | 337 – 342      |
| <b>Confidence in cumulative evidence</b>  | 17  | Describe how the strength of the body of evidence will be assessed (e.g., GRADE)                                                                                                                                                            | <input type="checkbox"/> | <input type="checkbox"/> | 333            |
