# Supplementary material for: Acceptance, adherence and dropout rates of individuals with COPD approached in telehealth interventions: a protocol for systematic review and meta-analysis
Source: PubMed Central journal article supplement — BMJ Open. 2019 Apr 25;9(4):e026794. doi: 10.1136/bmjopen-2018-026794 (PMC6501945; doi:10.1136/bmjopen-2018-026794), 2019-04-25
Supplement: bmjopen-2018-026794supp001.pdf [file bmjopen-2018-026794supp001.pdf]

Appendix 1: Medline (Ovid)

| Searches | Results                                                                        |       |
|----------|--------------------------------------------------------------------------------|-------|
| 1        | telecare.mp.                                                                   | 657   |
| 2        | tele home care.mp.                                                             | 11    |
| 3        | telehealth.mp. or telehealth/                                                  | 18768 |
| 4        | telemonitoring.mp. or telemonitoring/                                          | 1197  |
| 5        | telerehabilitation.mp. or telerehabilitation/                                  | 614   |
| 6        | telemedicine.mp. or telemedicine/                                              | 21271 |
| 7        | home monitoring.mp. or home monitoring/                                        | 1477  |
| 8        | digital monitoring.mp.                                                         | 44    |
| 9        | web-based monitoring.mp.                                                       | 38    |
| 10       | internet-based monitoring.mp.                                                  | 29    |
| 11       | 1 or 2 or 3 or 4 or 5 or 6 or 7 or 8 or 9 or 10                                | 24365 |
| 12       | limit 11 to English                                                            | 22898 |
| 13       | Chronic Obstructive Pulmonary Disease.mp. or chronic obstructive lung disease/ | 52167 |
| 14       | Chronic Obstructive Lung Disease.mp. or chronic obstructive lung disease/      | 34901 |
| 15       | COPD.mp. or chronic obstructive lung disease/                                  | 47721 |
| 16       | 13 or 14 or 15                                                                 | 60027 |
| 17       | 12 and 16                                                                      | 450   |
| 18       | limit 17 to English                                                            | 450   |
